# Supplementary material
Source: PubMed Central journal article supplement (PMC3857200)
Supplement: 13-1191.pdf [file 13-1191.pdf]

### Supplemental Figure

**Supplemental Figure 1.** Validation of PR antibody (H-190). Lane 1-4: HESCs were transfected with non-target siRNA (siNT) or *PGR* target siRNA (siPR). Forty-eight hours after transfection (defined as day 0), HESCs started treatment with decidual hormones for 3 days. The cells were collected on day 0 and day 3 for protein extraction. Lane 5-7: HESCs were transfected with empty pcDNA3 vector (Ctrl) or PRA vector or PRB vector which were constructed in pcDNA3 vector. 25  $\mu$ g protein was loaded in each lane for lane 1-5, while 5  $\mu$ g proteins were loaded each lane for lane 6-7.

Supplemental Figure 1.

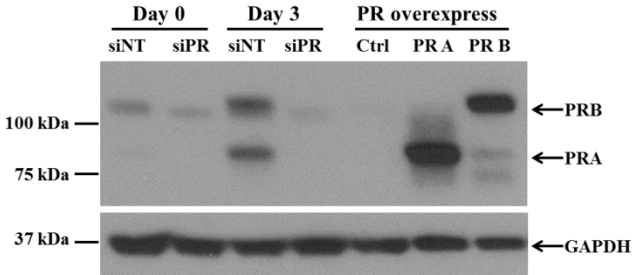

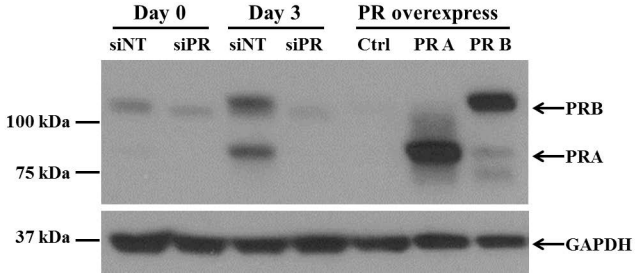

## Supplemental Tables

**TABLE 1.** Probes or primers used for qPCR with Taqman and SYBR Green method

| <i>Probes used for qPCR with Taqman method*</i>       |               |                                                                                   |                     |
|-------------------------------------------------------|---------------|-----------------------------------------------------------------------------------|---------------------|
| Gene                                                  | Probe         | Gene                                                                              | Probe               |
| COUP-TFII                                             | Hs01041380_g1 | CTNNB1                                                                            | Hs00355049_ml       |
| IGFBP1                                                | Hs00426285_ml | HBEGF                                                                             | Hs00181813_ml       |
| PRL                                                   | Hs00168730_ml | MIG6 (ERRFI1)                                                                     | Hs00219060_ml       |
| WNT4                                                  | Hs01573504_ml | PIK3R1                                                                            | Hs00381459_ml       |
| IL6                                                   | Hs00174131_ml | SPP1                                                                              | Hs00959010_ml       |
| IL8                                                   | Hs00174103_ml | FOSL1                                                                             | Hs04187685_ml       |
| PGR                                                   | Hs01556702_ml | JUN                                                                               | Hs01103582_s1       |
| FGF9                                                  | Hs00181829_ml | TGFB3                                                                             | Hs01086000_ml       |
| GLI3                                                  | Hs00609233_ml |                                                                                   |                     |
| <i>Primers used for qPCR with SYBR Green method**</i> |               |                                                                                   |                     |
| Gene                                                  | PrimerBank ID | Primer sequence                                                                   | Product Length (bp) |
| 18S <sup>†</sup>                                      | N/A           | Forward: 5'- CATAACGAACGAGACTCTGGCA -3'<br>Reverse: 5'- GGACATCTAAGGGCATCACAG -3' | 139                 |
| CCL2                                                  | 4506841a1     | Forward: 5'- CAGCCAGATGCAATCAATGCC -3'<br>Reverse: 5'- TGGAACTCTGAACCCACTTCT -3'  | 190                 |
| CSF1                                                  | 166235149c1   | Forward: 5'- TGGCGAGCAGGAGTATCAC -3'<br>Reverse: 5'- AGGTCTCCATCTGACTGTCAAT -3'   | 108                 |
| CXCL12                                                | 296011022c1   | Forward: 5'- ATTCTCAACACTCCAACTGTGC -3'<br>Reverse: 5'- ACTTTAGCTTCGGGTCAATGC -3' | 88                  |
| HGF                                                   | 58533162c1    | Forward: 5'- GCTATCGGGTAAAGACCTACA -3'<br>Reverse: 5'- CGTAGCGTACCTCTGGATTGC -3'  | 99                  |
| IL1R1                                                 | 27894331c2    | Forward: 5'- GGCTGAAAAGCATAGAGGGAAC -3'<br>Reverse: 5'- CTGGGCTCACAATCACAGG -3'   | 137                 |
| IL1R2                                                 | 27894333c2    | Forward: 5'- CCGCATCAACCTGACATGG -3'<br>Reverse: 5'- GCCACATCCGTGTCTCTT -3'       | 75                  |
| PTGS1                                                 | 18104968c2    | Forward: 5'- TGGCTCCAACCTTATCCC -3'<br>Reverse: 5'- AGAGGGCAGAATACGAGTGTA -3'     | 107                 |
| PTGS2                                                 | 223941909c1   | Forward: 5'- CTGGCGCTCAGCCATACAG -3'<br>Reverse: 5'- CGCACTTATACTGGTCAAATCCC -3'  | 94                  |
| STAR                                                  | 56243550c1    | Forward: 5'- GGGAGTGGAAACCCCAATGTC -3'<br>Reverse: 5'- CCAGCTCGTGAGTAATGAATGT -3' | 78                  |
| TNF                                                   | 25952110c1    | Forward: 5'- CCTCTCTCTAATCAGCCCTCTG -3'<br>Reverse: 5'- GAGGACCTGGGAGTAGATGAG -3' | 220                 |

\*Probes were purchased from Applied Biosystems (Foster City, CA);

\*\*The sequences of primers were from PrimerBank (<http://pga.mgh.harvard.edu/primerbank/index.html>) (Ref. 1)

<sup>†</sup>18S primers sequences were from (Ref. 2) with slightly modified.

### Reference

- Spandidos A, Wang X, Wang H, Seed B 2010 PrimerBank: a resource of human and mouse PCR primer pairs for gene expression detection and quantification. Nucl Acids Res. 38:D792-799
- Dai RY, Chen Y, Fu J, Dong LW, Ren YB, Yang GZ, Qian YW, Cao J, Tang SH, Yang SL, Wang HY 2009 p28GANK inhibits endoplasmic reticulum stress-induced cell death via enhancement of the endoplasmic reticulum adaptive capacity. Cell Res. 19:1243-1257

**TABLE 2.** Primers of ChIP-Seq binding region used in the qPCR with SYBR Green method

| <b>Gene</b> | <b>Primer sequence</b>                                                        | <b>Product Length (bp)</b> |
|-------------|-------------------------------------------------------------------------------|----------------------------|
| IL8         | Forward: 5'- GTAGGACACTTTTGGCAACA -3'<br>Reverse:5'- GACCATTTCAGTTCCATCTC -3' | 96                         |
| IL6ST       | Forward: 5'- CTCTCCCAGACTAGATCGAA -3'<br>Reverse:5'- GACCCCGTTATTCCACAGAA -3' | 91                         |
| PGR         | Forward: 5'- CCACAATCATTGACCTCAC -3'<br>Reverse:5'- GCACAAGGACATGAACAAC -3'   | 112                        |
| IGFBP1      | Forward: 5'- GTGTCCCTGGATTGCAGCAT -3'<br>Reverse:5'- CCATCATCTGCTCTTCCCAA -3' | 153                        |
| WNT4        | Forward: 5'- GGGACAAAGGGGAGACAAGC -3'<br>Reverse:5'- GAGTTAGCCTTCCCAGCCAT -3' | 108                        |

---

**TABLE 3.** Patient information for the samples of eutopic endometrium and ectopic lesion

---

| <b>Patient No.</b> | <b>Eutopic endometrium</b> | <b>Ectopic lesion</b> | <b>Stage of the cycle</b> | <b>Status of endometriosis</b> |
|--------------------|----------------------------|-----------------------|---------------------------|--------------------------------|
| 1                  | G64A                       | G64E                  | Early Secretory           | III                            |
| 2                  | G209A                      | G209                  | Early Secretory           | III                            |
| 3                  | G51E                       | G51F                  | Mid Secretory             | II                             |
| 4                  | G119B                      | G119I                 | Mid Secretory             | III                            |
| 5                  | G109C                      | G109B                 | Mid Secretory             | IV                             |
| 6                  | G198B                      | G198A                 | Mid Secretory             | II                             |
| 7                  | G221A                      | G221H                 | Late Secretory            | II                             |
| 8                  | G164A                      | G164F                 | Late Secretory            | III                            |
| 9                  | G204A                      | G204E                 | Late Secretory            | II-III                         |

---

**TABLE 4.** Top biology processes of genes regulated by COUP-TFII with DAVID analysis

| GO term                                          | Genes                                                                                                                                                                                                                                                                                                                                                                                                                                                                                                                                                                                                                                                                                                                                                                                                                                                                                                                                                                                                                                                                                                                                                                                                                                                                                                                                                                                                                                                                                                                    | Count | P-value  |
|--------------------------------------------------|--------------------------------------------------------------------------------------------------------------------------------------------------------------------------------------------------------------------------------------------------------------------------------------------------------------------------------------------------------------------------------------------------------------------------------------------------------------------------------------------------------------------------------------------------------------------------------------------------------------------------------------------------------------------------------------------------------------------------------------------------------------------------------------------------------------------------------------------------------------------------------------------------------------------------------------------------------------------------------------------------------------------------------------------------------------------------------------------------------------------------------------------------------------------------------------------------------------------------------------------------------------------------------------------------------------------------------------------------------------------------------------------------------------------------------------------------------------------------------------------------------------------------|-------|----------|
| Cell adhesion                                    | MTSS1, CADM1, NELL1, ZAN, LMO7, POSTN, CXCL12, CTNNB1, HMCN2, NEGR1, DSCAM, SPON1, PTPRK, CLCA2, PCDHGA11, ROCK1, MAGI1, PTPRT, AJAP1, SSPO, NCAM1, HES1, TNFAIP6, PODXL2, CX3CR1, ROR2, COL24A1, EDA, CD226, PLXNC1, CDK5R1, CCL2, PCDH20, NEDD9, SOX9, ITGBL1, ITGAX, ITGB7, KAL1, BAI1, SPP1, COL18A1, BMP1, PPFIBP1, ITGA4, MCAM, COL16A1, MUC4, LAMA2, LAMA1, ITGA6, ATP2A2, FREM3, DSG2, DSG3, FCGBP, SLURP1, COL21A1, CLSTN3, CLDN3, IGFBP7, NPNT, CNTNAP3, CEACAM1, SPACA4, PCDHB8, CNTN5, CNTN6, SDK1, PCDH7, ARVCF, CPXM1, CLDN2, CNTN1, VCAN, CNTN3, LIMS1, TNF, EPDR1, TNC, CCR1, CTNND2, KITLG, PCDHGC4, COL2A1, PCDHB11, CDH4, CDH6, COL9A1, CDH9, COL6A6, SORBS1, GP1BB, MYBPH, COL6A1, THBS1, PTPRC, COL4A3, HAPLN3, TNXB, COL13A1, NLGN1, COL15A1, NID1, CCL11, COL19A1, SNED1, CDH11                                                                                                                                                                                                                                                                                                                                                                                                                                                                                                                                                                                                                                                                                                                   | 108   | 6.38E-12 |
| Regulation of cell proliferation                 | HMX2, PTGS2, IL6ST, PDGFA, FGF17, PTGS1, TGFB3, MMP7, NR2E3, SHH, CTNNB1, PGR, CDKN2B, MYOCD, APOH, IFNK, ODZ1, PTPRK, VASH2, PTHLH, HES1, TNS3, ADAMTS8, JUN, FOXG1, CCL2, ERBB4, CLU, ST8SIA1, ASZ1, SOX9, BAI1, ADRA2A, NKX3-1, BMP4, COL18A1, SPHK1, KDR, BTLA, CDKN1C, LAMA1, PLA2G4A, FAPB3, TGFB3, PLAU, ADRA1D, FGF9, IGFBP7, E2F7, CXCR2, PAWR, SCGB1A1, GLI3, EDNRA, EDNRB, KISS1R, PTGES, HMOX1, HEY2, TGFA, NOS3, NOS2, FOSL1, LTA, CTBP2, FOXJ1, RXFP2, ESR2, IL6R, CD86, HIPK2, LACRT, SCIN, SCGB3A1, IL12B, VIP, FRK, TNF, PRTN3, FOXM1, CSF1, KITLG, IGF1R, DHCR7, BCL6, THBS1, PPAP2A, INGI, TLX1, NOX4, CEBPA, COL4A3, PTPRC, NACC2, PDS5B, IL8, NF1, SPARC, CDKN3, DBH, SOD2, BNC1, HBEGF, SP6, PTCH1, ID4, IGFBP3, FOXE3, IGFBP5                                                                                                                                                                                                                                                                                                                                                                                                                                                                                                                                                                                                                                                                                                                                                                     | 109   | 3.28E-09 |
| Cell surface receptor linked signal transduction | CGA, GDF2, IL6ST, FSTL1, LPAR1, SHH, CTNNB1, LPHN3, AGTR2, OR7C1, CFD, GNG7, PTPRJ, PTPRK, OR2S2, OR52K3P, MAGI1, PTPRT, PDYN, CCR9, CCR7, TACSTD2, JUN, PRAM1, CX3CR1, ROR1, ROR2, STC1, OR2B6, IL1R1, CDK5R1, OR2B3, ERBB4, ENPP2, CACNB3, BDKRB1, GPR143, ADCYAP1, ITGBL1, HCRTR2, IFNA2, BAI1, BAI3, BMP4, CAMLG, SMAD6, SPHK1, GPR150, HGF, OR1F1, COL16A1, GNAT2, KDR, BTLA, EPHA5, EPHA4, LAMA1, NPVF, TGFB3, RGS9, OR1A1, FGF9, TAS2R5, OR7E24, GLI3, EDNRA, EDNRB, KISS1R, OXER1, ZFYVE9, ANGPT1, NOS3, MAS1L, NOS2, CEACAM1, GPR173, GPR97, RXFP3, LOC646626, RXFP2, CD160, CLEC1A, INHBA, DOK2, LAX1, PTGDR, OR4N4, IL12B, RAPGEFL1, RASD1, GPR182, GPR62, CCR1, SORBS1, DGKG, CCBP2, MC3R, CD27, WNT8A, IL8, OR2IIP, GPR78, NPR1, DGKI, PTGFR, BIRC3, DKK4, CCL17, DKK2, P2RY12, LRP1, HBEGF, PTCH1, BAMB1, HTR2B, GNA14, MTSS1, PDGFA, GRIK2, FGF17, TGFB3, RPE65, CXCL12, VIPR2, MARCO, WNT4, WNT3, GALR1, MRGPRX3, ELTD1, RGR, PTHLH, NCAM1, GABRR3, GLP1R, CCL2, FKSG83, ADORA2B, KLRK1, NEDD9, GREM2, ITGAX, P2RY2, ITGB7, P2RY1, ADRA2A, OR10C1, GABRE, GABRA2, MYO1E, GABRA6, MALT1, ITGA4, GPR32, ITGA6, GPR39, MTNR1B, GPR31, ADRA1D, CD8A, RRH, CXCR2, TAAR8, VNIR4, FOS, HEY1, CXCR5, RSPO3, HEY2, TAAR5, KNG1, RAMP3, TBL1XR1, GABRG3, CNTN6, OXGR1, FSHR, UBE2B, GRP, TAS2R16, ADRB1, HIPK2, CNTN1, GAP43, VIP, NDP, GPR6, GPRC5B, GPR1, GPRC5A, IGF1R, GP1BB, DNER, GPR101, PPAP2A, PIK3R1, PTPRC, COL4A3, PTPRD, DTX1, OR7A5, RGS18, TAB1, WNT2B, OR3A3, OR3A1, GPR111, IGFBP1, OPRD1, GPR116 | 210   | 7.72E-09 |
| Blood vessel morphogenesis                       | FGF9, PDGFA, CXCL12, SHH, CTNNB1, ZFP36L1, EDNRA, ANGPTL6, APOB, AGTR2, HEY1, MYOCD, HMOX1, CCBE1, HEY2, TGFA, NOS3, HS6ST1, ANGPT1, NOS2, NR2F2, THBS1, CEACAM1, PTPRJ, BMP4, COL18A1, IL8, MYO1E, TBX4, NF1, COL15A1, ITGA4, MMP14, DBH, ARHGAP24, SLIT2, KDR, CXCL17, SH2D2A, JUN, PLAU                                                                                                                                                                                                                                                                                                                                                                                                                                                                                                                                                                                                                                                                                                                                                                                                                                                                                                                                                                                                                                                                                                                                                                                                                               | 41    | 1.17E-07 |
| Defense response                                 | ALS2, A2M, GRIK2, CXCR2, TLR4, ANKRD1, CFP, FOS, HTN1, SAA1, HIST1H2BI, PGLYRP2, HMOX1, IL1RAP, CFH, IFNK, NOS2, REG3G, MX1, CFD, FOSL1, GNG7, KNG1, SPACA3, C4A, LOC646626, CD160, IL25, PSG3, COLEC12, ESR2, IL6R, TRAT1, NCR3, CLEC1A, C1QA, CCR9, INHBB, TNFAIP6, CD83, INHBA, BPI, CCR7, GAGE3, PSG9, CX3CR1, PSG4, MNDA, CLEC5A, HLA-DRA, KIR2DL4, TNFAIP8L2, LALBA, IL1R1, CCL2, TNF, ADORA2B, DEFB125, CCR1, CLU, RSAD2, BDKRB1, DEFB127, TNFRSF1A, IFNA2, IFNA6, C2, THBS1, IL1RAPL2, SPP1, NOX4, LY75, PTPRC, HIST1H2BC, CAMLG, IL8, CFB, KIR2DS1, MALT1, CCL18, CCL17, CCL11, CXCL13, AOX1, IFNA13, PLA2G4C                                                                                                                                                                                                                                                                                                                                                                                                                                                                                                                                                                                                                                                                                                                                                                                                                                                                                                   | 85    | 2.52E-07 |
| Response to steroid hormone stimulus             | ALPL, A2M, TNF, CCL2, ERBB4, PTGS2, PDGFA, IGFBP7, PTGS1, TGFB3, ASZ1, TIMP3, SHH, CTNNB1, FOS, TNFRSF11B, BCHE, HMOX1, NOS3, ANGPT1, TFF1, THBS1, NEFL, FOSL1, SPP1, BMP4, PNLIPRP1, CYP11A1, CRYAB, SOCS3, RCAN1, IL6R, ESR2, MMP14, PLA2G4A, PTCH1, RGS9                                                                                                                                                                                                                                                                                                                                                                                                                                                                                                                                                                                                                                                                                                                                                                                                                                                                                                                                                                                                                                                                                                                                                                                                                                                              | 37    | 6.56E-07 |
| Vasculature development                          | FGF9, PDGFA, CXCL12, SHH, CTNNB1, ZFP36L1, EDNRA, ANGPTL6, APOB, AGTR2, HEY1, MYOCD, HMOX1, DHCR7, CCBE1, HEY2, TGFA, NOS3, HS6ST1, ANGPT1, NOS2, NR2F2, THBS1, CEACAM1, PTPRJ, BMP4, COL18A1, IL8, MYO1E, TBX4, NF1, COL15A1, ITGA4, MMP14, DBH, ARHGAP24, SLIT2, KDR, CXCL17, SH2D2A, JUN, TGFB3, PLAU                                                                                                                                                                                                                                                                                                                                                                                                                                                                                                                                                                                                                                                                                                                                                                                                                                                                                                                                                                                                                                                                                                                                                                                                                 | 43    | 1.89E-06 |
| Cell-cell signaling                              | ALS2, CGA, SYT5, FGF9, GRIK2, PDGFA, FAM3B, FGF17, LTBP4, SLC6A4, VIPR2, SHH, MBP, CTNNB1, PGR, WNT4, SPRY1, WNT3, NQO1, TAAR5, LTA, CHAT, PTPRJ, GABRG3, KCND2, SIX3, BSN, ESR2, PDYN, PTHLH, C1QA, TNFAIP6, GABRR3, INHBA, CD86, KIF1B, SEMA4F, UBC, STC1, GLP1R, LALBA, KCNM4, CPLX1, NDP, CCR1, ASZ1, PCDHB11, ADCYAP1, HCRTR2, IFNA2, TSPAN32, POU2F1, PRIMA1, GAD1, NOVA1, BMP4, BMP3, DLGAP1, GABRA2, FADS1, CPNE6, MAOA, GABRA6, NLGN1, PARK2, HGF, DBH, CCL18, LIN7A, CCL17, CXCL14, GRIA1, CXCL13, RAPSN, MTNR1B, LRP2, CHRNE, ADRA1D, SMPD3, MGST2                                                                                                                                                                                                                                                                                                                                                                                                                                                                                                                                                                                                                                                                                                                                                                                                                                                                                                                                                            | 80    | 2.51E-06 |
| Respiratory system development                   | CEBPA, BMP4, PDGFA, FGF9, TBX4, RPRGRIP1L, TGFB3, ASZ1, MMP14, TAB1, GLI3, SHH, ASAH1, CTNNB1, KDR, HES1, PTHLH, TNS3, ALDH1A3, DHCR7, HSD11B1, POU2F1, NOS3, HS6ST1                                                                                                                                                                                                                                                                                                                                                                                                                                                                                                                                                                                                                                                                                                                                                                                                                                                                                                                                                                                                                                                                                                                                                                                                                                                                                                                                                     | 24    | 7.77E-06 |
| Response to nutrient                             | ALPL, A2M, CCL2, STAR, PTGS2, PDGFA, IL6ST, IGFBP7, TIMP3, SHH, TNFRSF11B, CDKN2B, BCHE, HMOX1, SLC30A4, ANGPT1, LTA, SPP1, MUC1, BMP4, SOAT2, CYP11A1, CFB, FADS1, PLA2G4A, STC1, PTCH1, LRP2                                                                                                                                                                                                                                                                                                                                                                                                                                                                                                                                                                                                                                                                                                                                                                                                                                                                                                                                                                                                                                                                                                                                                                                                                                                                                                                           | 28    | 9.35E-06 |

**TABLE 4. Continued**

| <b>GO term</b>                                          | <b>Genes</b>                                                                                                                                                                                                                                                                                                                                                                                                                                                                                                                                                                                 | <b>Count</b> | <b>P-value</b> |
|---------------------------------------------------------|----------------------------------------------------------------------------------------------------------------------------------------------------------------------------------------------------------------------------------------------------------------------------------------------------------------------------------------------------------------------------------------------------------------------------------------------------------------------------------------------------------------------------------------------------------------------------------------------|--------------|----------------|
| Positive regulation of immune system process            | CADM1, ADORA2B, IL6ST, FCER2, TBX21, CLU, KLRK1, CACNB3, TLR4, BDKRB1, CXCL12, CFP, CFH, BCL6, IFNK, NOS2, C2, CFD, THBS1, CD27, PTPRC, SPACA3, CRTAM, IKZF1, C4A, FOXJ1, CFB, LOC646626, MALT1, IL6R, TRAT1, NCR3, C1QA, CD83, CD86, LAX1, IL12B, CD226, HLA-DRA                                                                                                                                                                                                                                                                                                                            | 39           | 1.75E-05       |
| Cell motion                                             | FGF19, MTSS1, PTGS2, CXCR2, MYLIP, CXCL12, SHH, EDNRB, APOB, CXCR5, UNC5B, SAA1, POU4F3, NOS3, SEMA3A, NR2F2, CEACAM1, VNN2, PTPRK, PHOX2B, ROCK1, FOXJ1, PSG2, IL6R, ESR2, MMP14, SLIT2, TNS3, SEMA4F, FOXG1, UBC, VCAN, IL12B, GAP43, PALM, CDK5R1, CCL2, TNF, ENPP2, CALD1, ASZ1, KITLG, CDH4, DNER, KAL1, ADRA2A, PPAP2A, THBS1, ETV4, LMX1B, IL8, PODXL, ATP1A4, ITGA4, DBH, KDR, FEZF2, EPHA4, LAMA1, ITGA6, TGFB3, HBEGF, LRP8, PLAU                                                                                                                                                  | 64           | 2.13E-05       |
| Immune response                                         | CD8A, CADM1, PAX5, IFI44L, TLR4, CXCL12, MBP, CFP, PGLYRP2, IL1RAP, MS4A1, CFH, NOS2, ODZ1, CFD, LTA, CRTAM, C4A, FOXJ1, LOC646626, TNFRSF17, COLEC12, IL6R, FCAMR, TRAT1, NCR3, C1QA, CCR9, CD83, BPI, CCR7, CD86, IL18BP, LAX1, IL12B, GBP4, EDA, CLEC5A, KIR2DL2, LCP1, HLA-DRA, TNFAIP8L2, IL1R2, IL1R1, CCL2, TNF, ENPP2, CCR1, UNG, CLU, OAS3, RSAD2, OAS1, DEFB127, OAS2, PF4V1, KAAG1, TNFRSF1A, IGF1R, PROCR, ICOS, POU2F2, CCBP2, C2, THBS1, IL1RAPL2, CD27, LY75, PTPRC, IL8, CFB, SMAD6, KIR2DS1, MALT1, DBH, CCL18, CCL17, CCL11, BTLA, CXCL14, CXCL13, SP2, TGFB3, IFI6, OPRD1 | 85           | 2.50E-05       |
| Negative regulation of multicellular organismal process | HS3ST5, TNF, ADORA2B, PTGS2, GRIK2, PDGFA, TSPAN8, SOX9, SCGB1A1, TNFRSF11B, AGTR2, BCHE, HMOX1, APOH, PCSK9, NOS3, BCL6, THBS1, SRGN, KNG1, IL6R, LRPAP1, INHBA, CD83, BPI, ADRB1, ATP2A2, PTCH1, ADRA1D, PLAU                                                                                                                                                                                                                                                                                                                                                                              | 30           | 2.51E-05       |
| Angiogenesis                                            | PDGFA, FGF9, CXCL12, SHH, CTNNA1, EDNRA, ANGPTL6, HMOX1, CCBE1, TGFA, NOS3, ANGPT1, HS6ST1, THBS1, CEACAM1, BMP4, COL18A1, IL8, TBX4, COL15A1, ARHGAP24, MMP14, SLIT2, KDR, SH2D2A, CXCL17, JUN, PLAU                                                                                                                                                                                                                                                                                                                                                                                        | 28           | 2.67E-05       |
| Regulation of cell activation                           | ADORA2B, PDGFA, IL6ST, TBX21, KLRK1, TLR4, RORA, PAWR, SPINK5, SCGB1A1, SHH, HMOX1, NOS3, BCL6, THBS1, CD27, PTPRC, SPACA3, IKZF1, FOXJ1, LOC646626, MALT1, BTLA, INHBA, CD83, CD86, BPI, LAX1, PRAM1, IL12B, CD226                                                                                                                                                                                                                                                                                                                                                                          | 31           | 3.39E-05       |
| Female pregnancy                                        | MUC1, CSH1, PTGS2, IGFBP7, PSG2, TGFB3, PSG3, PSG1, COL16A1, SCGB1A1, IL11RA, ADCYAP1, PTHLH, FOS, PSG9, PLA2G4A, PSG6, PAPP, PSG5, PSG4, FOSL1, PLAU, SPP1                                                                                                                                                                                                                                                                                                                                                                                                                                  | 23           | 3.43E-05       |
| Response to endogenous stimulus                         | CGA, A2M, PTGS2, STAR, PDGFA, IGFBP7, PTGS1, TGFB3, RPE65, SHH, CTNNA1, FOS, TNFRSF11B, HMOX1, ANGPT1, NOS3, FOSL1, GNG7, CYP11A1, SOCS3, CRYAB, IL6R, ESR2, MMP14, UBE2B, CAPN10, ALPL, TNF, CCL2, ERBB4, ASZ1, TIMP3, IGF1R, SORBS1, BCHE, REN, MS1, PCSK9, TFF1, THBS1, NEFL, PIK3R1, SPP1, BMP4, PNLIPRP1, FADS1, RCAN1, DBH, ABCG1, PLA2G4A, FABP3, TGFB3, PTCH1, IGFBP1, RGS9, MGST1                                                                                                                                                                                                   | 56           | 3.62E-05       |
| Regulation of cell migration                            | GDF2, ERBB4, ENPP2, PDGFA, IL6ST, CSF1, BDKRB1, CXCL12, SHH, IGF1R, PRR5, AGTR2, KISS1R, SERPINE2, HMOX1, APOH, THBS1, PIK3R1, COL18A1, PTPRK, NF1, SPHK1, IL6R, KDR, LAMA2, LAMA1, HBEGF, TGFB3, IGFBP3, IGFBP5                                                                                                                                                                                                                                                                                                                                                                             | 30           | 4.47E-05       |
| Regulation of leukocyte mediated immunity               | PTPRC, CRTAM, CADM1, ADORA2B, FOXJ1, TBX21, FCER2, KLRK1, MALT1, NCR3, HMOX1, PRAM1, BCL6, IL12B, CD226, DPP4                                                                                                                                                                                                                                                                                                                                                                                                                                                                                | 16           | 5.09E-05       |



**TABLE 5.** Listing of top significantly enriched sequence motifs identified using the SeqPos tool on the web-based application Cistrome for the dataset containing COUP-TFII binding sites

| ID      | Factors | DNA-binding domain                   | Consensus    | <i>P</i> value |
|---------|---------|--------------------------------------|--------------|----------------|
| M01268  | NR1H4   | Hormone-nuclear Receptor Family      | RGGTCAY      | 1E-30          |
| UP00009 | NR2F2   | Hormone-nuclear Receptor Family      | 7GGTCA4      | 1E-30          |
| M01282  | PPARA   | Hormone-nuclear Receptor Family      | RAGGTCA      | 1E-30          |
| hPDI020 | ZNF655  | BetaBetaAlpha-zinc finger Family     | AGGTSA       | 1E-30          |
| UP00048 | RARA    | Hormone-nuclear Receptor Family      | 7GGTCA4      | 1E-30          |
| hPDI182 | ZNF71   | BetaBetaAlpha-zinc finger Family     | ARRGGTCA     | 1E-30          |
| M01198  | Nr1h2   | Hormone-nuclear Receptor Family      | 1G1T1A1AG4   | 1E-30          |
| MC00005 | RXRG    | Hormone-nuclear Receptor Family      | GGTCAAAGGTCA | 1E-30          |
| EN0033  | RXRA    | Hormone-nuclear Receptor Family      | GCAAAGGTCA   | 1E-30          |
| MA0017  | NR2F1   | Hormone-nuclear Receptor Family      | 5CA2G1TC1    | 1E-30          |
| M01153  | NR1I2   | Cys4 zinc finger of nuclear receptor | RVAGKTCA     | 1E-30          |
| M01589  | ESRRB   | Cys4 zinc finger of nuclear receptor | YCAAGGTCASSS | 1E-30          |
| EN0418  | NR2C2   | Hormone-nuclear Receptor Family      | 1GG2A2GG3    | 1E-30          |
| UP00079 | ESRRA   | Hormone-nuclear Receptor Family      | 5AAGGT7      | 1E-30          |
| UP00066 | HNF4A   | Hormone-nuclear Receptor Family      | 7GGTCA5      | 1E-30          |
| M01650  | NR2E3   | Hormone-nuclear Receptor Family      | 4T1A1A2T1A   | 1E-30          |
| EN0372  | SP1     | BetaBetaAlpha-zinc finger Family     | 3CA1AG2C2    | 1E-30          |
| EN0414  | TCF12   | Helix-Loop-Helix Family (bHLH)       | 4G3A1AG2C1   | 1E-30          |
| MC00013 | CEBPB   | Leucine zipper Family (bZIP)         | 4TTG3AA1     | 1E-30          |
| EN0008  | CEBPA   | Leucine zipper Family (bZIP)         | ATTRCMYAAYYH | 1E-30          |
| M00473  | FOXO1   | Forkhead Domain Family               | HTTGTTTWYK   | 1E-30          |
| M01132  | SF1     | Cys4 zinc finger of nuclear receptor | YCAAGGYCA    | 1E-30          |
| M01728  | NR2F6   | Hormone-nuclear Receptor Family      | 2G2CA1AG4    | 1E-30          |
| hPDI075 | THRA    | Hormone-nuclear Receptor Family      | GTKRCC       | 1E-30          |
| UP00245 | HOXC10  | Homeodomain Family                   | 5TC1T1AA4    | 1E-30          |
| MA0067  | PAX2    | Homeodomain Family                   | VMRTGACW     | 1E-30          |
| M00731  | RUNX2   | Runt Domain Family                   | KTGTGGT      | 2.0E-27        |
| MA0018  | CREB1   | Leucine zipper Family (bZIP)         | TGRCGTCA     | 7.7E-23        |
| M01142  | NR5A2   | Hormone-nuclear Receptor Family      | CKRRCCTTGvac | 1.9E-17        |
| M00961  | VDR     | Hormone-nuclear Receptor Family      | DGGTTCACMSRG | 8.9E-13        |
| MA0084  | SRY     | High Mobility Group (Box) Family     | KWWAACAAW    | 2.5E-06        |

**TABLE 6.** Biology processes of genes that altered by COUP-TFII identified with microarray and showing COUP-TFII binding sites identified with ChIP-seq

| GO Term                                          | Genes                                                                                                                                                                                                                                                                                                                                                                                                                 | Count | P-Value |
|--------------------------------------------------|-----------------------------------------------------------------------------------------------------------------------------------------------------------------------------------------------------------------------------------------------------------------------------------------------------------------------------------------------------------------------------------------------------------------------|-------|---------|
| Cell adhesion                                    | MTSS1, COL21A1, NPNT, IGFBP7, ZAN, LMO7, CXCL12, CTNNB1, NEGR1, PTPRK, PCDHGA11, MAGI1, ROCK1, CNTN5, CNTN6, SDK1, PCDH7, HES1, TNFAIP6, PODXL2, CNTN1, ROR2, COL24A1, CD226, PLXNC1, LIMS1, CCL2, EPDR1, TNC, KITLG, NEDD9, PCDHGC4, CDH4, ITGBL1, COL6A6, SORBS1, MYBPH, COL6A1, THBS1, SPP1, COL18A1, COL4A3, PTPRC, TNXB, PPFIBP1, NLGN1, COL15A1, NID1, MCAM, LAMA2, LAMA1, COL19A1, FREM3, ATP2A2, ITGA6, CDH11 | 56    | <0.0001 |
| Vasculature development                          | PTPRJ, COL18A1, IL8, MYO1E, NF1, COL15A1, ARHGAP24, CXCL12, SLIT2, CTNNB1, ZFP36L1, EDNRA, SH2D2A, CXCL17, APOB, MYOCD, JUN, CCBE1, TGFB3, HS6ST1, ANGPT1, NR2F2, THBS1, PLA1                                                                                                                                                                                                                                         | 24    | <0.0001 |
| Regulation of cell proliferation                 | CCL2, IL6ST, IGFBP7, CSF1, PTGS1, ST8SIA1, TGFB3, ASZ1, KITLG, GLI3, SCGB1A1, CTNNB1, PGR, EDNRA, IGF1R, MYOCD, PTGES, PPAP2A, THBS1, FOSL1, INGI, NOX4, COL18A1, PTPRK, COL4A3, PTPRC, CTBP2, IL8, NF1, RXFP2, SPARC, IL6R, VASH2, SOD2, HES1, TNS3, LAMA1, PLA2G4A, ADAMTS8, JUN, TGFB3, HBEGF, IL12B, PLA1, ADRA1D                                                                                                 | 45    | <0.0001 |
| Enzyme linked receptor protein signaling pathway | MTSS1, CCL2, GRIK2, IL6ST, TGFB3, FSTL1, GREM2, FOS, IGF1R, SORBS1, ZFYVE9, ANGPT1, PIK3R1, GNG7, PTPRJ, PTPRK, PTPRD, MYO1E, SMAD6, HGF, EPHA5, JUN, ROR1, HBEGF, ROR2, TGFB3, IGFBP1                                                                                                                                                                                                                                | 27    | <0.0001 |
| Angiogenesis                                     | COL18A1, IL8, COL15A1, ARHGAP24, CXCL12, SLIT2, CTNNB1, EDNRA, CXCL17, SH2D2A, JUN, CCBE1, ANGPT1, HS6ST1, THBS1, PLA1                                                                                                                                                                                                                                                                                                | 16    | <0.0001 |
| Regulation of cell migration                     | COL18A1, PTPRK, IL6ST, CSF1, NF1, BDKRB1, IL6R, CXCL12, LAMA2, LAMA1, IGF1R, PRR5, HBEGF, TGFB3, THBS1, PIK3R1                                                                                                                                                                                                                                                                                                        | 16    | <0.0001 |
| Response to steroid hormone stimulus             | A2M, CCL2, CRYAB, IGFBP7, PTGS1, TGFB3, ASZ1, IL6R, CTNNB1, FOS, PLA2G4A, TNFRSF11B, ANGPT1, RGS9, THBS1, FOSL1, SPP1                                                                                                                                                                                                                                                                                                 | 17    | <0.0001 |
| Response to endogenous stimulus                  | A2M, CCL2, IGFBP7, PTGS1, TGFB3, ASZ1, CTNNB1, FOS, IGF1R, TNFRSF11B, SORBS1, REN, ANGPT1, THBS1, FOSL1, PIK3R1, SPP1, GNG7, CRYAB, IL6R, ABCG1, PLA2G4A, TGFB3, RGS9, IGFBP1                                                                                                                                                                                                                                         | 25    | 0.0001  |
| Female pregnancy                                 | FOS, PSG9, PLA2G4A, PAPP, IGFBP7, PSG4, TGFB3, SCGB1A1, FOSL1, IL11RA, PLA1, SPP1                                                                                                                                                                                                                                                                                                                                     | 12    | 0.0001  |
| Cytoskeleton organization                        | MTSS1, PALM, CALD1, PREX1, ASZ1, NEDD9, LMO7, CTNNB1, CORO2B, PRR5, PFN4, SORBS1, PAK1, FGD6, FGD4, TNXB, ROCK1, CRYAB, NF1, MID1, SVIL, MAP2, SGCD, MAP7, LCP1, TMOD1                                                                                                                                                                                                                                                | 26    | 0.0001  |
| Localization of cell                             | PTPRK, CCL2, ROCK1, IL8, ASZ1, KITLG, IL6R, CXCL12, SLIT2, LAMA1, TNS3, APOB, ITGA6, HBEGF, TGFB3, IL12B, PPAP2A, NR2F2, THBS1, PLA1                                                                                                                                                                                                                                                                                  | 20    | 0.0003  |
| Actin filament-based process                     | MTSS1, TNXB, ROCK1, CALD1, MYO1E, PREX1, NF1, LMO7, NEDD9, CORO2B, PRR5, SORBS1, PFN4, FGD6, LCP1, FGD4, TMOD1                                                                                                                                                                                                                                                                                                        | 17    | 0.0004  |
| Response to heat                                 | PLA2G4A, CCL2, HSPB6, CRYAB, IGFBP7, ST8SIA1, THBS1, SCARA5                                                                                                                                                                                                                                                                                                                                                           | 8     | 0.0005  |
| Actin cytoskeleton organization                  | MTSS1, TNXB, ROCK1, CALD1, PREX1, NF1, LMO7, NEDD9, CORO2B, PRR5, SORBS1, PFN4, FGD6, LCP1, FGD4, TMOD1                                                                                                                                                                                                                                                                                                               | 16    | 0.0006  |
| Response to organic substance                    | IL1R1, A2M, CCL2, IL6ST, IGFBP7, PTGS1, TGFB3, ASZ1, BDKRB1, CTNNB1, EDNRA, IGF1R, TNFRSF1A, FOS, TNFRSF11B, APOB, SORBS1, REN, ANGPT1, THBS1, FOSL1, PIK3R1, GNG7, SPP1, COL4A3, CRYAB, COLEC12, IL6R, ABCG1, PLA2G4A, JUN, TGFB3, RGS9, IGFBP1                                                                                                                                                                      | 34    | 0.0006  |
| Positive regulation of biosynthetic process      | CRTC1, TGFB3, SPI1, KITLG, RORB, RORA, GLI3, CTNNB1, FOS, TNFRSF1A, IGF1R, NPAS2, SORBS1, MYOCD, POU2F1, NR2F2, THBS1, NFATC2, INGI, FOSL1, MYST4, TBL1XR1, NFE2, RXFP2, AFF1, HMGA1, ABCG1, SOD2, HES1, PLA2G4A, JUN, UBC, IL12B                                                                                                                                                                                     | 33    | 0.0006  |
| TGF beta receptor signaling pathway              | PTPRK, FOS, CCL2, ZFYVE9, JUN, SMAD6, TGFB3, TGFB3                                                                                                                                                                                                                                                                                                                                                                    | 8     | 0.0007  |
| Embryo implantation                              | IGFBP7, SCGB1A1, IL11RA, PLA1, SPP1                                                                                                                                                                                                                                                                                                                                                                                   | 5     | 0.0063  |
| Chemotaxis                                       | CXCL17, CCR7, CCL2, IL8, CXCL13, IL6R, SEMA3A, FOSL1, CXCL12, SLIT2, PLA1                                                                                                                                                                                                                                                                                                                                             | 11    | 0.0069  |
| Inflammatory response                            | NOX4, A2M, CCL2, IL8, BDKRB1, IL6R, FOS, TNFRSF1A, TNFAIP6, CCR7, CXCL13, IL1RAP, AOX1, PLA2G4C, THBS1, CFD, SPP1                                                                                                                                                                                                                                                                                                     | 17    | 0.0078  |

**TABLE 7.** Reproductive diseases and disorder of genes regulated by COUP-TFII with IPA analysis

| Diseases                 | Molecules                                                                                                                                                                                                                                                                                                         | Count | P-Value  |
|--------------------------|-------------------------------------------------------------------------------------------------------------------------------------------------------------------------------------------------------------------------------------------------------------------------------------------------------------------|-------|----------|
| Uterine cancer           | ADH1B,ANXA3,CAPN6,CDH11,CDH4,COL15A1,CRABP2,CSF1,CTNNB1,CXCL12,EDNRA,FOS,GLI3,GPRC5A,GPX3,HMGA1,HSD17B6,HSPB6,HTR2B,IFIT3,IGF1R,IGFBP7,IL8,ITGA6,ITPR1,JUN,KRT34,LDB2,LMOD1,MAPK10,MATN2,MRV11,NEGR1,NR2F2,PGR,PIK3R1,PLXNC1,PPAP2A,PRUNE2,PTGFR,RAD51B,RREB1,SCARA5,SNCAIP,SPP1,SPSB1,ST7L,TGFB3,TGFBR3,TNC,TNXB | 51    | 3.48E-09 |
| Endometriosis            | ABCG1,ANGPT1,CAPN6,CCL2,CNTN1,COL18A1,COL6A1,CXCL13,ERRFI1,FOS,GAS6,GPX3,GUCY1B3,HGF,IGFBP1,IL1R1,IL1R2,IL8,ITGA6,JUN,MBP,PFKFB3,PGR,PIK3R1,PLA2G4A,PTGS1,RREB1,SERPINB1,SLC6A6,SMAD6,SORBS1,SP2,SPP1,TNFRSF1A                                                                                                    | 34    | 1.47E-08 |
| Inflammatory response    | A2M,ANGPT1,AOX1,BDKRB1,CCL2,CCR7,CHI3L1,COL18A1,CSF1,CXCL12,CXCL13,EDNRA,FOS,HAVCR2,HGF,IL12B,IL1R1,IL1RAP,IL6ST,IL8,KITLG,MSR1,NEDD9,NFATC2,NOX4,PDE4B,PLA2G4A,PLAU,PREX1,PTGES,PTGS1,PTPRC,PTPRJ,ROCK1,RORA,SCGB1A1,SERPINB1,SLIT2,SPI1,SPP1,THBS1,TNFAIP3,TNFAIP6,TNFRSF1A,UACA                                | 46    | 2.48E-08 |
| Chemotaxis of leukocytes | ANGPT1,CCL2,CCR7,CSF1,CXCL12,CXCL13,EDNRA,IL12B,IL1R1,IL6R,IL8,KITLG,NEDD9,PDE4B,PLAU,PREX1,PTGES,PTPRC,PTPRJ,ROCK1,SERPINB1,SLIT2,SPI1,SPP1,THBS1,TNFRSF1A                                                                                                                                                       | 26    | 9.77E-07 |
